# Supplementary material for: The seipin complex Fld1/Ldb16 stabilizes ER–lipid droplet contact sites
Source: PubMed Central journal article supplement — J Cell Biol. 2015 Nov 23;211(4):829–44. doi: 10.1083/jcb.201502070 (PMC4657162; doi:10.1083/jcb.201502070), 2015-11-23
Supplement: supp_jcb.201502070_JCB_201502070_sm.pdf [file supp_jcb.201502070_JCB_201502070_sm.pdf]

Grippa et al., <http://www.jcb.org/cgi/content/full/jcb.201502070/DC1>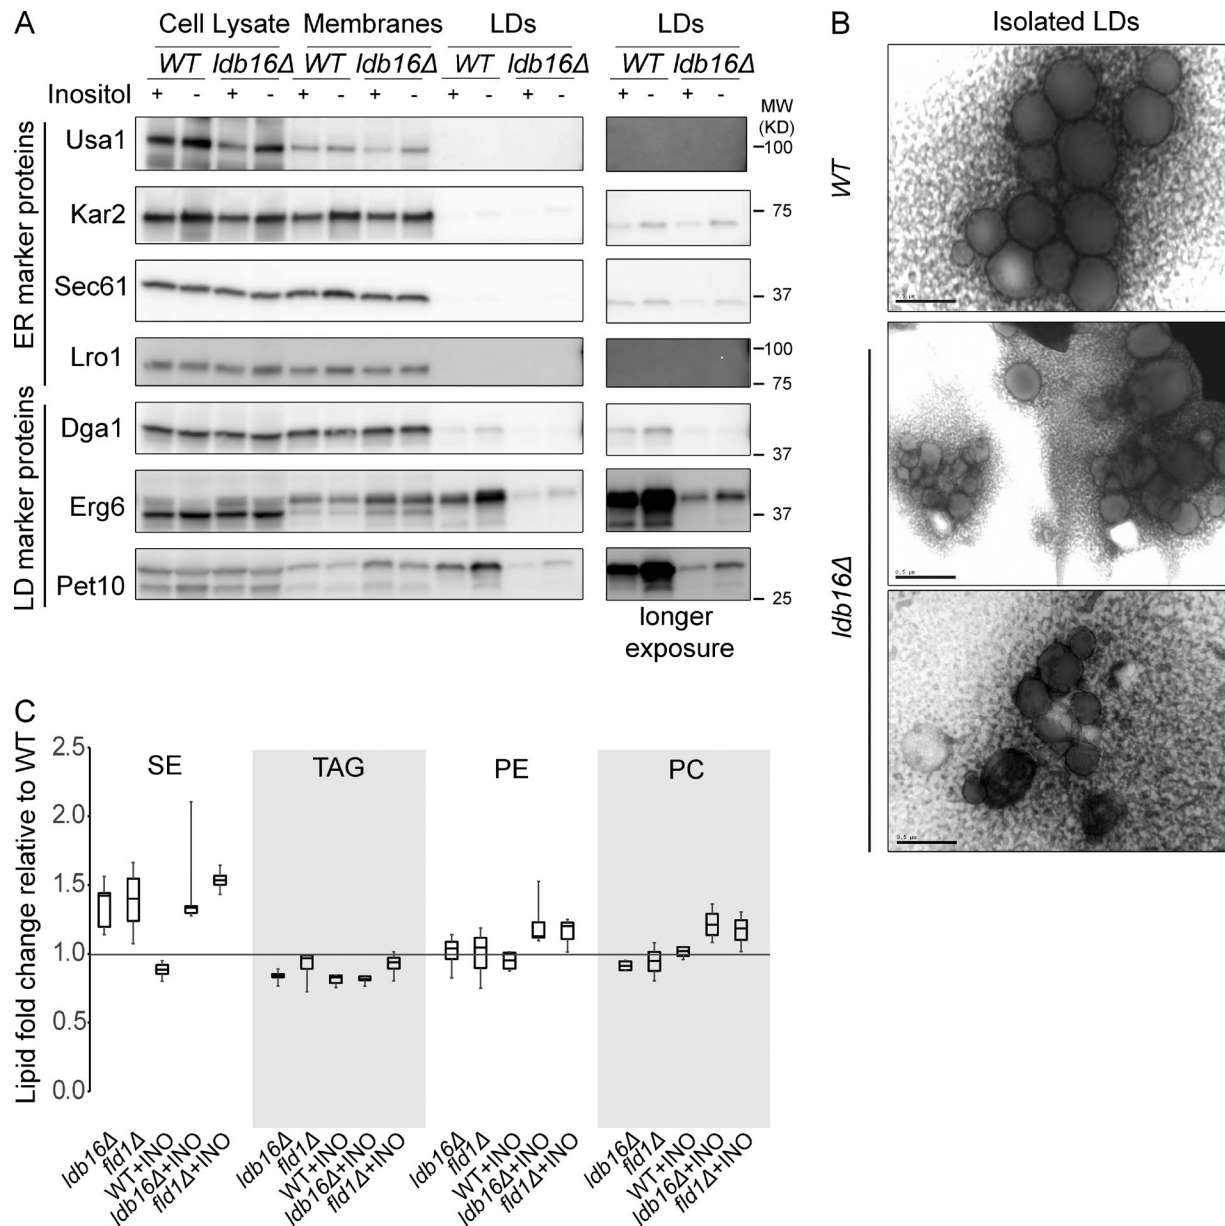

Figure S1. **Characterization of LDs isolated from *wt*, *fld1Δ*, and *ldb16Δ* cells.** (A) Whole-cell lysates, membrane, or LD fractions of cells with the indicated genotype were analyzed by SDS-PAGE followed by Western blotting with antibodies against the indicated ER or LD proteins. (B) Negative-stain electron micrographs of LDs isolated from cells with the indicated genotype. Bars, 500 nm. (C) Lipid composition of cells with the indicated genotype and grown in SC or SC supplemented with 75  $\mu$ M inositol (+INO). Lipid extracts from *wt* cells grown in SC media were used as reference. The result of at least three independent experiments is shown in the graph; whiskers represent the maximum and minimum values.

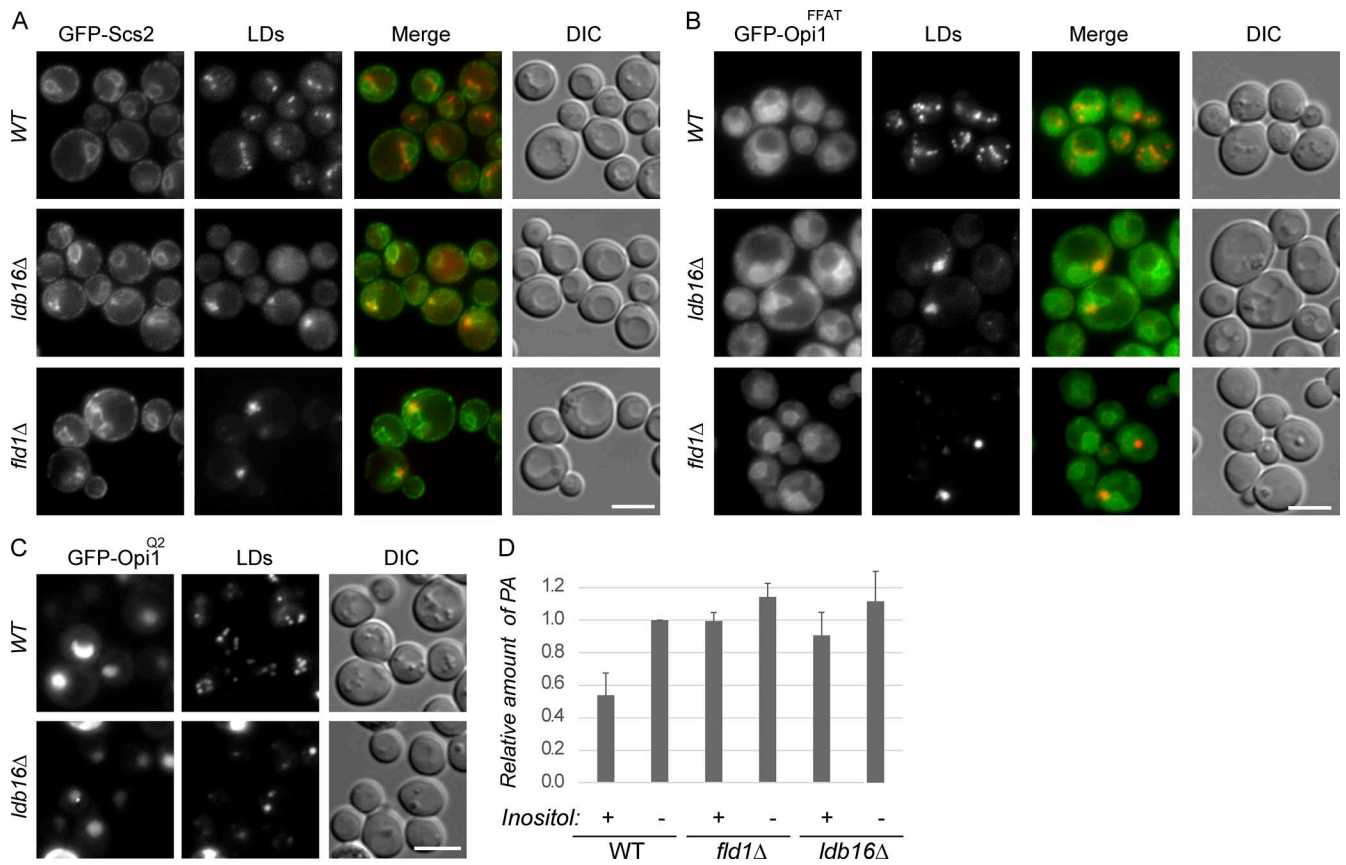

Figure S2. **Distribution of Scs2, Scs2-binding, and PA-binding domains of Opi1 and PA in *fld1Δ* and *ldb16Δ* mutants.** (A) Localization of GFP-Scs2 in *wt*, *ldb16Δ*, and *fld1Δ* cells grown in SC media to early stationary phase. LDs were stained with the neutral lipid dye MDH. Bar, 5  $\mu$ m. (B) Localization of GFP-Opi1<sup>FFAT</sup> in *wt*, *ldb16Δ*, and *fld1Δ* cells grown in SC media to early stationary phase. LDs were stained with the neutral lipid dye MDH. Bar, 5  $\mu$ m. (C) Localization of GFP-Opi1<sup>Q2</sup> in cells with the indicated genotype. Plasmid-borne GFP-Opi1<sup>Q2</sup> expression was driven by the constitutive *PRC1* promoter. LDs were stained with the neutral lipid dye MDH. Bar, 5  $\mu$ m. (D) Amount of PA in cells with the indicated genotype and grown in SC media or SC supplemented with inositol (75  $\mu$ M). Lipids were labeled to steady state with [<sup>14</sup>C]acetate, extracted and analyzed by thin layer chromatography. The content of PA, relative to *wt* cells grown in SC media, is presented as the mean of three independent experiments, and error bars represent SD.

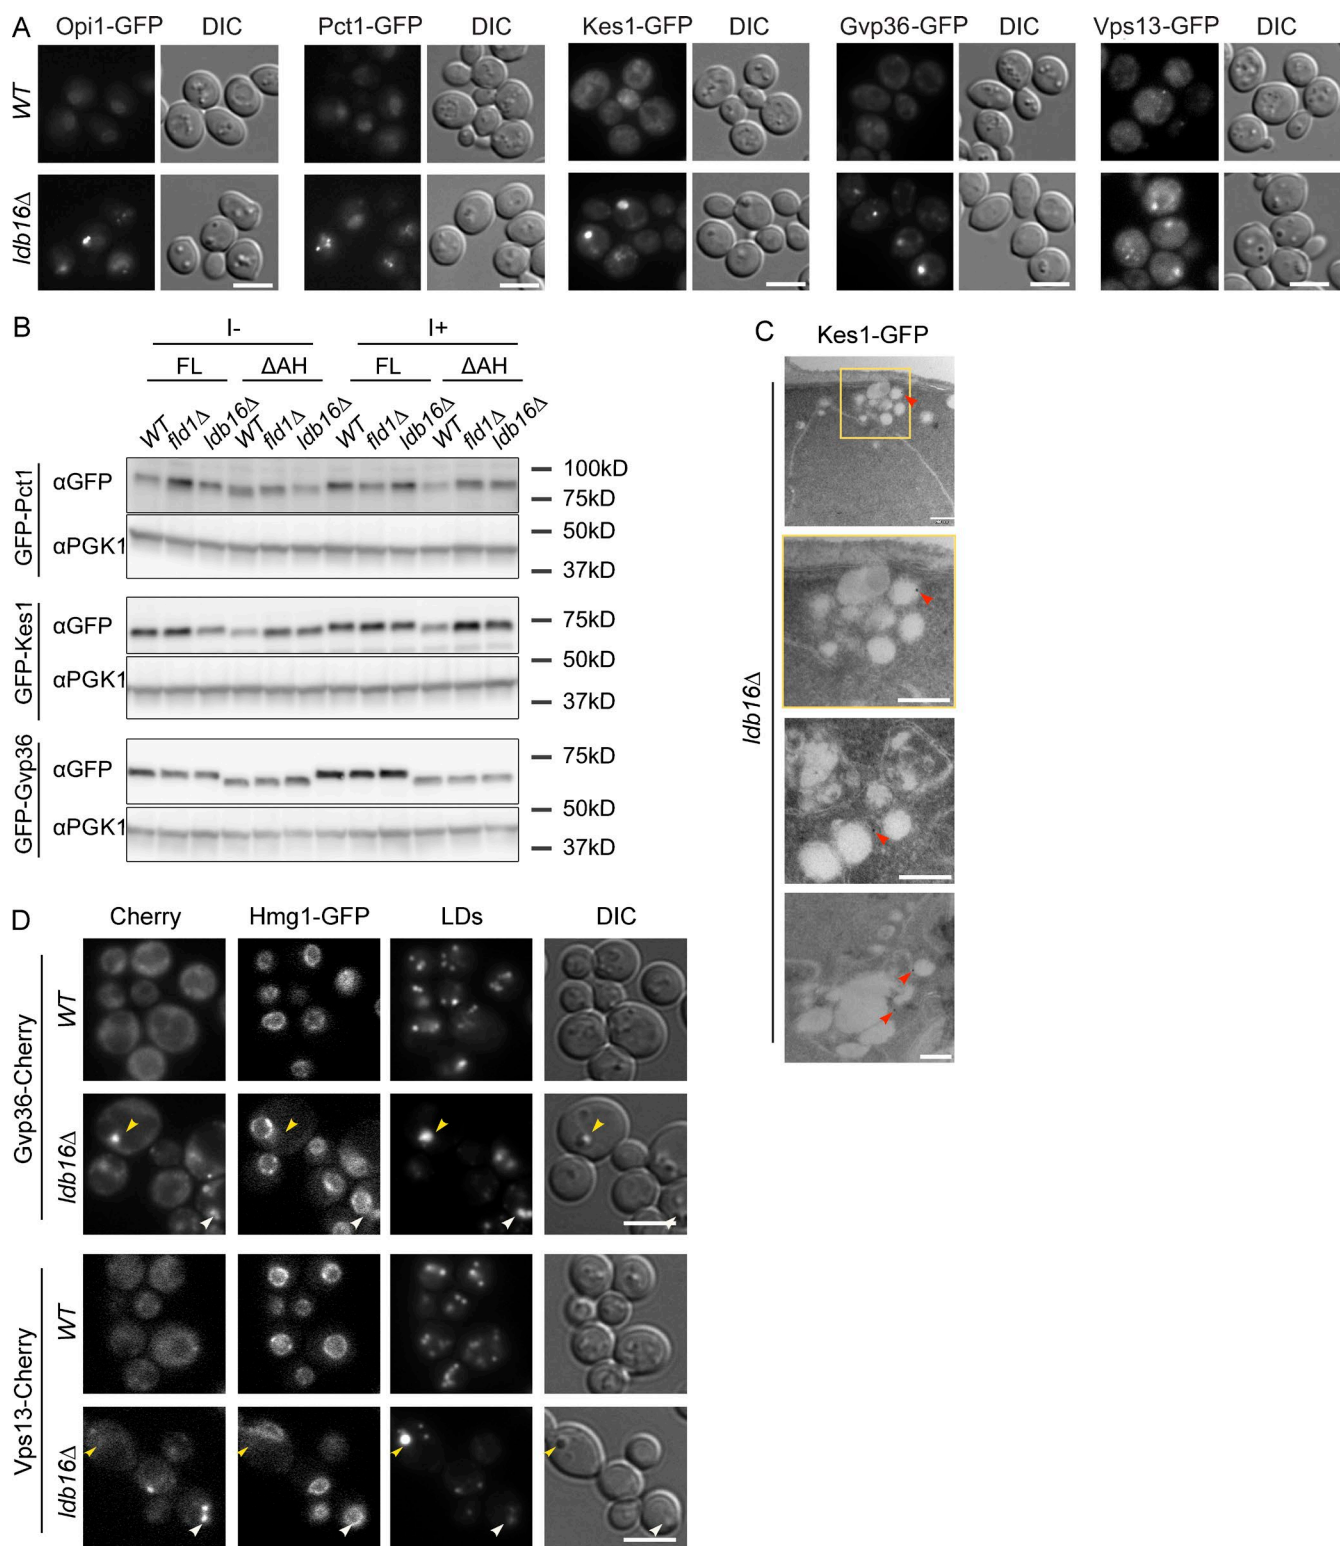

Figure S3. **AH-containing proteins are specifically relocalized in seipin complex mutants.** (A) Localization of the proteins Opi1, Pct1, Kes1, Gvp36, and Vps13 in wt and *ldb16Δ* cells. All proteins were expressed from their endogenous locus as C-terminal GFP fusions. Bar, 5  $\mu$ m. (B) Steady-state levels of full-length Pct1, Kes1, Gvp36 (FL), and the corresponding counterparts lacking the AHs ( $\Delta$ AH) in cells with the indicated genotype. Protein extracts of cells grown in the indicated media were subjected to SDS page and analyzed by Western blotting with anti-GFP antibody. Phosphoglycerate kinase 1 (Pgk1) was used as loading control and detected with anti-Pgk1 antibody. (C) Electron micrographs showing the immunolocalization of endogenously expressed Kes1-GFP in *ldb16Δ* cells, which were prepared as described in the Materials and methods section, Arrowheads point to 12-nm immunogold particles labeling specifically Kes1-GFP in association with lipid droplets aggregates. Bars, 200 nm. (D) Localization of the AH-containing proteins Gvp36 and Vps13 in wt and *ldb16Δ* cells grown in SC media to early stationary phase. Proteins were expressed from their endogenous locus as C-terminal mCherry fusions. Nuclear envelope is labeled by endogenously expressed Hmg1-GFP. LDs are stained with the neutral lipid dye MDH. Yellow arrowheads indicate supersized LDs; white arrowheads indicate LD aggregates. Bar, 5  $\mu$ m.

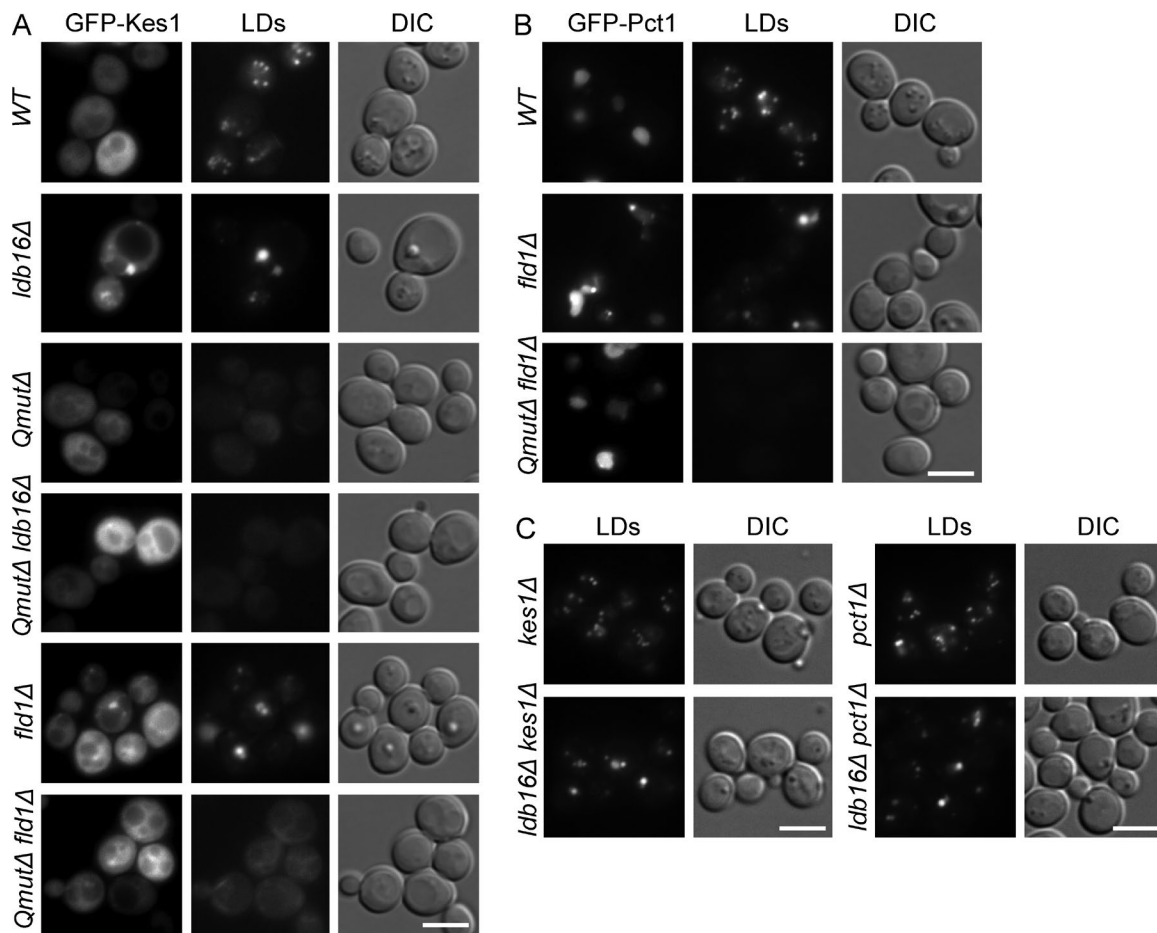

Figure S4. **LD assembly causes phospholipid-packing defects in Seipin complex mutants.** (A) Localization of GFP-Kes1 in cells with (*wt*, *ldb16Δ*, and *fld1Δ*) and without (*are1Δ are2Δ dga1Δ Iro1Δ*, *are1Δ are2Δ dga1Δ Iro1Δ ldb16Δ*, and *are1Δ are2Δ dga1Δ Iro1Δ fld1Δ*) LDs. Cells were grown in SC media up to early stationary phase. LDs were stained with the neutral lipid dye MDH. Bar, 5  $\mu$ m. (B) Localization of GFP-Pct1 in cells with the indicated genotype. LDs were stained with the neutral lipid dye MDH. Bar, 5  $\mu$ m. (C) Deletion of *KES1* or *PCT1* does not affect LD morphology in presence or absence of *LDB16*. LDs of cells with the indicated genotype were stained with the neutral lipid dye MDH. Bar, 5  $\mu$ m.

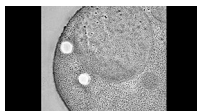

Video 1. **Morphology ER-LD contact sites in a *wt* cell shown in Fig. 7 A (left).** Late logarithmic *wt* cells were high-pressure frozen and subjected to freeze substitution. 250-nm-thick sections were analyzed by dual-axis electron tomography and tilted images aligned to generate the tomogram shown.

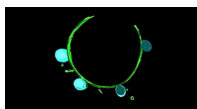

Video 2. **3D reconstruction of ER-LD contact sites of a *wt* cell shown in Video 1.** The ER is shown in green and LDs in blue.

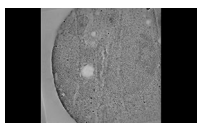

Video 3. **Morphology of a contact site between ER and a supersized LD in an *ldb16Δ* cell shown in Fig. 7 B (left).** Late logarithmic *ldb16Δ* cells were high-pressure frozen, subjected to freeze substitution and serial 250nm thick sections imaged by dual-axis electron tomography. Reconstruction was generated by aligning tomograms of serial sections.

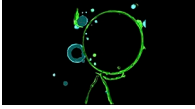

Video 4. **3D reconstruction of the ER-LD contact site in an *ldb16Δ* cell shown in Video 3.** The ER is shown in green and LDs in blue.

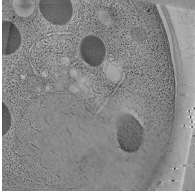

Video 5. **Morphology of a contact site between ER and a LD aggregate in an *ldb16Δ* cell shown in Fig. 7 C (bottom).** Late logarithmic *ldb16Δ* cells were high-pressure frozen and subjected to freeze substitution. 250-nm-thick sections were analyzed by dual-axis electron tomography and tilted images aligned to generate the tomogram shown.

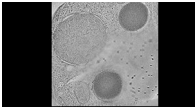

Video 6. **Morphology of a contact site between ER and a LD aggregate in an *ldb16Δ* cell shown in Fig. 7 C (top).** Late logarithmic *ldb16Δ* cells were high-pressure frozen and subjected to freeze substitution. 250-nm-thick sections were analyzed by dual axis electron tomography and tilted images aligned to generate the tomogram shown.

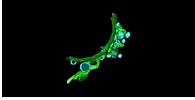

Video 7. **3D reconstruction of the ER-LD contact site in an *ldb16Δ* cell shown in Video 6.** The ER is shown in green and LDs in blue.

Table S1. LD-specific proteins reduced in LDs isolated from *fld1Δ* and *ldb16Δ* cells, as determined by label-free quantitative mass spectrometry

| Name       |          | <i>fld1Δ</i> |                         | <i>ldb16Δ</i> |                          |
|------------|----------|--------------|-------------------------|---------------|--------------------------|
| Systematic | Standard | logFC        | P                       | logFC         | P                        |
| YLL012W    | Yeh1     | -7.78649     | 1.13 × 10 <sup>-5</sup> | -5.05418      | 8.77 × 10 <sup>-4</sup>  |
| YOL048C    | Rrt8     | -3.7425      | 1.27 × 10 <sup>-4</sup> | -3.41304      | 2.63 × 10 <sup>-5</sup>  |
| YDL193W    | Nus1     | -3.49958     | 9.97 × 10 <sup>-5</sup> | -2.40426      | 1.02 × 10 <sup>-4</sup>  |
| YOR246C    | Yor246c  | -3.25081     | 6.85 × 10 <sup>-5</sup> | -2.45812      | 1.60 × 10 <sup>-5</sup>  |
| YGR263C    | Say1     | -3.24911     | 3.83 × 10 <sup>-4</sup> | -2.25961      | 2.05 × 10 <sup>-4</sup>  |
| YMR313C    | Tgl3     | -3.24879     | 8.08 × 10 <sup>-5</sup> | -2.54358      | 6.01 × 10 <sup>-5</sup>  |
| YMR148W    | Osw5     | -3.08516     | 2.28 × 10 <sup>-4</sup> | -2.58567      | 1.97 × 10 <sup>-3</sup>  |
| YKL140W    | Tgl1     | -3.06946     | 2.61 × 10 <sup>-4</sup> | -2.43399      | 1.78 × 10 <sup>-4</sup>  |
| YBR041W    | Fat1     | -3.00532     | 3.26 × 10 <sup>-4</sup> | -2.1922       | 7.36 × 10 <sup>-4</sup>  |
| YPL206C    | Pgc1     | -2.9476      | 1.41 × 10 <sup>-4</sup> | -3.1552       | 8.86 × 10 <sup>-5</sup>  |
| YIL124W    | Ayr1     | -2.94212     | 8.75 × 10 <sup>-4</sup> | -1.77792      | 8.77 × 10 <sup>-3</sup>  |
| YKR046C    | Pet10    | -2.88843     | 1.59 × 10 <sup>-4</sup> | -2.14085      | 2.34 × 10 <sup>-4</sup>  |
| YPR139C    | Vps66    | -2.88325     | 2.22 × 10 <sup>-4</sup> | -1.64523      | 2.15 × 10 <sup>-2</sup>  |
| YHR072W    | Erg7     | -2.6831      | 1.10 × 10 <sup>-3</sup> | -3.13586      | 3.00 × 10 <sup>-6</sup>  |
| YDL052C    | Slc1     | -2.33422     | 4.94 × 10 <sup>-4</sup> | -1.43428      | 9.79 × 10 <sup>-3</sup>  |
| YLR100W    | Erg27    | -2.32554     | 5.69 × 10 <sup>-4</sup> | -1.90138      | 1.72 × 10 <sup>-3</sup>  |
| YOR245C    | Dga1     | -1.98278     | 6.85 × 10 <sup>-3</sup> | -1.19096      | 5.91 × 10 <sup>-2</sup>  |
| YKR067W    | Gpt2     | -1.78775     | 1.62 × 10 <sup>-2</sup> | -1.69292      | 1.24 × 10 <sup>-1</sup>  |
| YMR246W    | Faa4     | -1.46686     | 1.10 × 10 <sup>-2</sup> | -1.74005      | 1.13 × 10 <sup>-2</sup>  |
| YIL009W    | Faa3     | -1.44055     | 2.29 × 10 <sup>-2</sup> | -1.91776      | 1.62 × 10 <sup>-2</sup>  |
| YMR110C    | Hfd1     | -1.34235     | 3.15 × 10 <sup>-2</sup> | -1.99597      | 3.29 × 10 <sup>-3</sup>  |
| YML008C    | Erg6     | -1.27227     | 1.43 × 10 <sup>-2</sup> | -1.62012      | 4.79 × 10 <sup>-3</sup>  |
| YKL094W    | Yju3     | -1.26406     | 1.66 × 10 <sup>-2</sup> | -1.23556      | 2.12 × 10 <sup>-2</sup>  |
| YBR002C    | Rer2     | -3.43938     | 1.27 × 10 <sup>-4</sup> | -2.42116      | 5.27E × 10 <sup>-3</sup> |
| YIL124W    | Ayr1     | -2.94212     | 8.75 × 10 <sup>-4</sup> | -1.77792      | 8.77 × 10 <sup>-3</sup>  |
| YBR265W    | Tsc10    | -3.11278     | 9.39 × 10 <sup>-5</sup> | -2.55269      | 3.41 × 10 <sup>-4</sup>  |

Table S2. Peripheral membrane proteins increased in LDs isolated from *fld1Δ* and *ldb16Δ* cells, as determined by label-free quantitative mass spectrometry and confirmed by fluorescence microscopy

| Name       |          | <i>fld1Δ</i> |                         | <i>ldb16Δ</i> |                         |
|------------|----------|--------------|-------------------------|---------------|-------------------------|
| Systematic | Standard | logFC        | P                       | logFC         | P                       |
| YHL020C    | Opi1     | 5.489566     | 1.46 × 10 <sup>-4</sup> | 4.20386       | 6.32 × 10 <sup>-6</sup> |
| YPR097W    | Ypr097w  | 3.716108     | 1.17 × 10 <sup>-4</sup> | 2.281816      | 6.38 × 10 <sup>-4</sup> |
| YLL040C    | Vps13    | 2.827194     | 6.16 × 10 <sup>-4</sup> | 2.056947      | 2.57 × 10 <sup>-3</sup> |
| YLR380W    | Csr1     | 2.803219     | 4.00 × 10 <sup>-4</sup> | 1.653667      | 1.12 × 10 <sup>-2</sup> |
| YGR202C    | Pct1     | 2.473526     | 8.19 × 10 <sup>-4</sup> | 2.180898      | 3.08 × 10 <sup>-4</sup> |
| YIL041W    | Gvp36    | 2.371785     | 9.15 × 10 <sup>-3</sup> | 2.775928      | 8.10 × 10 <sup>-5</sup> |
| YPL145C    | Kes1     | 1.918121     | 5.72 × 10 <sup>-3</sup> | 1.21771       | 6.65 × 10 <sup>-2</sup> |

Table S3. Quantification of anti-GFP immunogold particles in LDs from cells expressing the indicated GFP proteins or untagged control

| LDs              | Profiles observed | Profiles with IG | Number of IG particles |
|------------------|-------------------|------------------|------------------------|
| Pct1-GFP         |                   |                  |                        |
| Cytoplasmic LDs  | 84                | 7                | 9                      |
| Intranuclear LDs | 72                | 12               | 20                     |
| Kes1-GFP         |                   |                  |                        |
| Cytoplasmic LDs  | 95                | 21               | 31                     |
| Intranuclear LDs | 39                | 0                | 0                      |
| Untagged         |                   |                  |                        |
| Cytoplasmic LDs  | 96                | 1                | 1                      |
| Intranuclear LDs | 47                | 0                | 0                      |

IG, immunogold.

Table S4. **Quantification of anti-GFP immunogold particles in *wt* cells expressing Ldb16-GFP and untagged control cells**

| <b>Cells</b> | <b>ER-LD contact sites<sup>a</sup></b> | <b>ER</b> | <b>Nucleus</b> | <b>Vacuole</b> | <b>Mitochondria</b> |
|--------------|----------------------------------------|-----------|----------------|----------------|---------------------|
| Untagged     | 1                                      | 9         | 127            | 6              | 40                  |
| Ldb16-GFP    | 10                                     | 5         | 109            | 10             | 31                  |

For each strain, the quantification was performed from 100 micrographs imaged at 26,500x. Numbers correspond to the immunogold particles associated with the indicated organelles. The number of ER contact sites observed in the Ldb16-GFP strain and in the untagged control was 130 and 126, respectively.

<sup>a</sup>ER-LD contact sites are defined as the region within 30-nm radius of the point where ER and LDs appear in contact.

Table S5. Yeast strains used in this study

| Strain  | Genotype                                                                                                            |
|---------|---------------------------------------------------------------------------------------------------------------------|
| BY4741  | <i>Mat a ura3Δ0 his3Δ1 leu2Δ0 met15Δ0</i>                                                                           |
| BY4742  | <i>Mat α ura3Δ0 his3Δ1 leu2Δ0 lys2Δ0</i>                                                                            |
| yPC3975 | <i>Mat a ura3Δ0 his3Δ1 leu2Δ0 met15Δ0 fld1::KAN</i>                                                                 |
| yPC4002 | <i>Mat a ura3Δ0 his3Δ1 leu2Δ0 met15Δ0 fld1::HYGB</i>                                                                |
| yPC4246 | <i>Mat a ura3Δ0 his3Δ1 leu2Δ0 met15Δ0 ldb16::KAN</i>                                                                |
| yPC4307 | <i>Mat a ura3Δ0 his3Δ1 leu2Δ0 met15Δ0 OSW5-GFP-KAN</i>                                                              |
| yPC4397 | <i>Mat a ura3Δ0 his3Δ1 leu2Δ0 met15Δ0 OSW5-GFP-KAN ldb16::HYGB</i>                                                  |
| yPC5777 | <i>Mat a ura3Δ0 his3Δ1 leu2Δ0 met15Δ0 PET10-GFP-HIS3</i>                                                            |
| yPC5837 | <i>Mat ? ura3Δ0 his3Δ1 leu2Δ0 PET10-GFP-HIS3 ldb16::HYGB</i>                                                        |
| yPC5778 | <i>Mat a ura3Δ0 his3Δ1 leu2Δ0 met15Δ0 TGL1-GFP-HIS3</i>                                                             |
| yPC5840 | <i>Mat ? ura3Δ0 his3Δ1 leu2Δ0 TGL1-GFP-HIS3 ldb16::HYGB</i>                                                         |
| yPC5776 | <i>Mat a ura3Δ0 his3Δ1 leu2Δ0 met15Δ0 YEH1-GFP-HIS3</i>                                                             |
| yPC6438 | <i>Mat a ura3Δ0 his3Δ1 leu2Δ0 met15Δ0 YEH1-GFP-HIS3 ldb16::HYGB</i>                                                 |
| yPC5266 | <i>Mat a ura3Δ0 his3Δ1 leu2Δ0 met15Δ0 OPI1-GFP-HIS3</i>                                                             |
| yPC5583 | <i>Mat ? ura3Δ0 his3Δ1 leu2Δ0 OPI1-GFP-HIS3 ldb16::HYGB</i>                                                         |
| yPC5558 | <i>Mat a ura3Δ0 his3Δ1 leu2Δ0 met15Δ0 PCT1-GFP-HIS3</i>                                                             |
| yPC5577 | <i>Mat ? ura3Δ0 his3Δ1 leu2Δ0 PCT1-GFP-HIS3 ldb16::HYGB</i>                                                         |
| yPC7303 | <i>Mat a ura3Δ0 his3Δ1 leu2Δ0 met15Δ0 PCT1-GFP-HIS3 opi3::KAN</i>                                                   |
| yPC5559 | <i>Mat a ura3Δ0 his3Δ1 leu2Δ0 met15Δ0 KES1-GFP-HIS3</i>                                                             |
| yPC7811 | <i>Mat a ura3Δ0 his3Δ1 leu2Δ0 met15Δ0 KES1-GFP-HIS3 ldb16::HYGB</i>                                                 |
| yPC5581 | <i>Mat a ura3Δ0 his3Δ1 leu2Δ0 met15Δ0 KES1-GFP-HIS3 fld1::NAT</i>                                                   |
| yPC5554 | <i>Mat a ura3Δ0 his3Δ1 leu2Δ0 met15Δ0 GVP36-GFP-HIS3</i>                                                            |
| yPC5563 | <i>Mat a ura3Δ0 his3Δ1 leu2Δ0 met15Δ0 GVP36-GFP-HIS3 ldb16::HYGB</i>                                                |
| yPC7300 | <i>Mat a ura3Δ0 his3Δ1 leu2Δ0 met15Δ0 GVP36-GFP-HIS3 opi3::KAN</i>                                                  |
| yPC5923 | <i>Mat a ura3Δ0 his3Δ1 leu2Δ0 met15Δ0 VPS13-GFP-HIS3</i>                                                            |
| yPC5985 | <i>Mat a ura3Δ0 his3Δ1 leu2Δ0 met15Δ0 VPS13-GFP-HIS3 ldb16::HYGB</i>                                                |
| yPC6450 | <i>Mat a ura3Δ0 his3Δ1 leu2Δ0 met15Δ0 OPI1-mCHERRY-URA2 HMG1-GFP-HIS3</i>                                           |
| yPC6453 | <i>Mat ? ura3Δ0 his3Δ1 leu2Δ0 OPI1-mCHERRY-URA2 HMG1-GFP-HIS3 ldb16::HYGB</i>                                       |
| yPC7989 | <i>Mat a ura3Δ0 his3Δ1 leu2Δ0 met15Δ0 PCT1-mCHERRY-URA3 HMG1-GFP-HIS3</i>                                           |
| yPC7425 | <i>Mat a ura3Δ0 his3Δ1 leu2Δ0 met15Δ0 PCT1-mCHERRY-URA3 HMG1-GFP-HIS3 ldb16::HYGB</i>                               |
| yPC7453 | <i>Mat a ura3Δ0 his3Δ1 leu2Δ0 met15Δ0 KES1-mCHERRY-URA3 HMG1-GFP-HIS3</i>                                           |
| yPC7455 | <i>Mat ? ura3Δ0 his3Δ1 leu2Δ0 KES1-mCHERRY-URA3 HMG1-GFP-HIS3 ldb16::HYGB</i>                                       |
| yPC8124 | <i>Mat ? ura3Δ0 his3Δ1 leu2Δ0 PCT1-mCHERRY-URA3 KES1-GFP-HIS3</i>                                                   |
| yPC8125 | <i>Mat ? ura3Δ0 his3Δ1 leu2Δ0 PCT1-mCHERRY-URA3 KES1-GFP-HIS3 fld1::NAT</i>                                         |
| yPC8129 | <i>Mat ? ura3Δ0 his3Δ1 leu2Δ0 PCT1-mCHERRY-URA3 KES1-GFP-HIS3 ldb16::HYGB</i>                                       |
| yPC5266 | <i>Mat a ura3Δ0 his3Δ1 leu2Δ0 met15Δ0 OPI1-GFP-HIS3</i>                                                             |
| yPC5585 | <i>Mat a ura3Δ0 his3Δ1 leu2Δ0 met15Δ0 OPI1-GFP-HIS3 fld1::NAT</i>                                                   |
| yPC5583 | <i>Mat a ura3Δ0 his3Δ1 leu2Δ0 met15Δ0 OPI1-GFP-HIS3 ldb16::HYGB</i>                                                 |
| yPC5950 | <i>Mat ? ura3Δ0 his3Δ1 leu2Δ0 OPI1-GFP-HIS3 scs2::KAN</i>                                                           |
| yPC5949 | <i>Mat ? ura3Δ0 his3Δ1 leu2Δ0 OPI1-GFP-HIS3 scs2::KAN fld1::NAT</i>                                                 |
| yPC5952 | <i>Mat ? ura3Δ0 his3Δ1 leu2Δ0 OPI1-GFP-HIS3 scs2::KAN ldb16::HYGB</i>                                               |
| yPC6260 | <i>Mat a leu2-3, 122 ura3-52 his3D200 trp-D900 lys2-8-1 suc2D9 &lt;PHO5p-GFP-Op1<sup>FFAT</sup>&gt;</i>             |
| yPC6264 | <i>Mat a leu2-3, 122 ura3-52 his3D200 trp-D900 lys2-8-1 suc2D9 fld1::NAT &lt;PHO5p-GFP-Op1<sup>FFAT</sup>&gt;</i>   |
| yPC6340 | <i>Mat a leu2-3, 122 ura3-52 his3D200 trp-D900 lys2-8-1 suc2D9 ldb16::HYGB &lt;PHO5p-GFP-Op1<sup>FFAT</sup>&gt;</i> |
| yPC6037 | <i>Mat a ura3Δ0 his3Δ1 leu2Δ0 met15Δ0 &lt;TEFp-GFP-Spo20<sup>51-91</sup>, 2micron, URA&gt;</i>                      |
| yPC6038 | <i>Mat a ura3Δ0 his3Δ1 leu2Δ0 met15Δ0 fld1::HYGB &lt;TEFp-GFP-Spo20<sup>51-91</sup>, 2micron, URA&gt;</i>           |
| yPC6058 | <i>Mat a ura3Δ0 his3Δ1 leu2Δ0 met15Δ0 ldb16::KANR &lt;TEFp-GFP-Spo20<sup>51-91</sup>, 2micron, URA&gt;</i>          |
| yPC6039 | <i>Mat a ura3Δ0 his3Δ1 leu2Δ0 met15Δ0 opi3::KANR &lt;TEFp-GFP-Spo20<sup>51-91</sup>, 2micron, URA&gt;</i>           |
| yPC7647 | <i>Mat a ura3Δ0 his3Δ1 leu2Δ0 met15Δ0 &lt;Flag-GFP-KES1, CEN, URA&gt;</i>                                           |
| yPC7648 | <i>Mat a ura3Δ0 his3Δ1 leu2Δ0 met15Δ0 ldb16::KAN &lt;Flag-GFP-KES1, CEN, URA&gt;</i>                                |
| yPC7669 | <i>Mat a ura3Δ0 his3Δ1 leu2Δ0 met15Δ0 fld1::HYGB &lt;Flag-GFP-KES1, CEN, URA&gt;</i>                                |
| yPC7888 | <i>Mat a ura3Δ0 his3Δ1 leu2Δ0 met15Δ0 &lt;Flag-GFP-KES1<sup>Δ2-29</sup>, CEN, URA&gt;</i>                           |
| yPC7882 | <i>Mat a ura3Δ0 his3Δ1 leu2Δ0 met15Δ0 ldb16::KAN &lt;Flag-GFP-KES1<sup>Δ2-29</sup>, CEN, URA&gt;</i>                |
| yPC7885 | <i>Mat a ura3Δ0 his3Δ1 leu2Δ0 met15Δ0 fld1::HYGB &lt;Flag-GFP-KES1<sup>Δ2-29</sup>, CEN, URA&gt;</i>                |
| yPC7645 | <i>Mat a ura3Δ0 his3Δ1 leu2Δ0 met15Δ0 &lt;Flag-GFP-PCT1, CEN, URA&gt;</i>                                           |
| yPC7646 | <i>Mat a ura3Δ0 his3Δ1 leu2Δ0 met15Δ0 ldb16::KAN &lt;Flag-GFP-PCT1, CEN, URA&gt;</i>                                |
| yPC7668 | <i>Mat a ura3Δ0 his3Δ1 leu2Δ0 met15Δ0 fld1::HYGB &lt;Flag-GFP-PCT1, CEN, URA&gt;</i>                                |
| yPC7881 | <i>Mat a ura3Δ0 his3Δ1 leu2Δ0 met15Δ0 &lt;Flag-GFP-PCT1<sup>Δ261-282</sup>, CEN, URA&gt;</i>                        |
| yPC7884 | <i>Mat a ura3Δ0 his3Δ1 leu2Δ0 met15Δ0 ldb16::KAN &lt;Flag-GFP-PCT11<sup>Δ261-282</sup>, CEN, URA&gt;</i>            |
| yPC7887 | <i>Mat a ura3Δ0 his3Δ1 leu2Δ0 met15Δ0 fld1::HYGB &lt;Flag-GFP-PCT11<sup>Δ261-282</sup>, CEN, URA&gt;</i>            |
| yPC8237 | <i>Mat a ura3Δ0 his3Δ1 leu2Δ0 met15Δ0 &lt;GVP36-GFP, CEN, URA&gt;</i>                                               |



Table S5. Yeast strains used in this study (Continued)

| Strain  | Genotype                                                                                                                                                         |
|---------|------------------------------------------------------------------------------------------------------------------------------------------------------------------|
| yPC8241 | <i>Mat a ura3Δ0 his3Δ1 leu2Δ0 met15Δ0 ldb16::KAN &lt; GVP36-GFP, CEN, URA&gt;</i>                                                                                |
| yPC8239 | <i>Mat a ura3Δ0 his3Δ1 leu2Δ0 met15Δ0 fld1::HYGB &lt; GVP36-GFP, CEN, URA&gt;</i>                                                                                |
| yPC8238 | <i>Mat a ura3Δ0 his3Δ1 leu2Δ0 met15Δ0 &lt; GVP36<sup>Δ2-35</sup>-GFP, CEN, URA&gt;</i>                                                                           |
| yPC8242 | <i>Mat a ura3Δ0 his3Δ1 leu2Δ0 met15Δ0 ldb16::KAN &lt; GVP36<sup>Δ2-35</sup>-GFP, CEN, URA&gt;</i>                                                                |
| yPC8240 | <i>Mat a ura3Δ0 his3Δ1 leu2Δ0 met15Δ0 fld1::HYGB &lt; GVP36<sup>Δ2-35</sup>-GFP, CEN, URA&gt;</i>                                                                |
| yPC7791 | <i>Mat a ura3Δ0 his3Δ1 leu2Δ0 are1::KAN are2::HYGB dga1::NAT lro1::KAN &lt; Flag-GFP-PCT1, CEN, URA&gt;</i>                                                      |
| yPC7794 | <i>Mat a ura3Δ0 his3Δ1 leu2Δ0 are1::KAN are2::HYGB dga1::NAT lro1::KAN ldb16::HIS &lt; Flag-GFP-PCT1, CEN, URA&gt;</i>                                           |
| yPC8538 | <i>Mat a ura3Δ0 his3Δ1 leu2Δ0 are1::KAN are2::HYGB dga1::NAT lro1::KAN fld1::HIS &lt; Flag-GFP-PCT1, CEN, URA&gt;</i>                                            |
| yPC7267 | <i>Mat a ura3Δ0 his3Δ1 leu2Δ0 are1::KAN are2::HYGB dga1::NAT lro1::KAN &lt;TEFp-GFP-Spo20<sup>51-91</sup>, 2micron, URA&gt;</i>                                  |
| yPC7268 | <i>Mat a ura3Δ0 his3Δ1 leu2Δ0 are1::KAN are2::HYGB dga1::NAT lro1::KAN ldb16::HIS &lt;TEFp-GFP-Spo20<sup>51-91</sup>, 2micron, URA&gt;</i>                       |
| yPC8540 | <i>Mat a ura3Δ0 his3Δ1 leu2Δ0 are1::KAN are2::HYGB dga1::NAT lro1::KAN fld1::HIS &lt;TEFp-GFP-Spo20<sup>51-91</sup>, 2micron, URA&gt;</i>                        |
| yPC8307 | <i>Mat ? ura3Δ0 his3Δ1 leu2Δ0 are1::KANR are2::HYGB lro1::HIS KANR-GALp-DGA1 &lt; Flag-GFP-KES1, CEN, URA&gt; &lt;ADH1p-GAL4-ER-VP16,CEN,LEU &gt;</i>            |
| yPC8306 | <i>Mat ? ura3Δ0 his3Δ1 leu2Δ0 are1::KANR are2::HYGB lro1::HIS KANR-GALp-DGA1 ldb16::NAT &lt; Flag-GFP-KES1, CEN, URA&gt; &lt;ADH1p-GAL4-ER-VP16,CEN,LEU &gt;</i> |
| yPC8305 | <i>Mat ? ura3Δ0 his3Δ1 leu2Δ0 are1::KANR are2::HYGB lro1::HIS KANR-GALp-DGA1 &lt; Flag-GFP-PCT1, CEN, URA&gt; &lt;ADH1p-GAL4-ER-VP16,CEN,LEU &gt;</i>            |
| yPC8304 | <i>Mat ? ura3Δ0 his3Δ1 leu2Δ0 are1::KANR are2::HYGB lro1::HIS KANR-GALp-DGA1 ldb16::NAT &lt; Flag-GFP-PCT1, CEN, URA&gt; &lt;ADH1p-GAL4-ER-VP16,CEN,LEU &gt;</i> |
| yPC8070 | <i>Mat ? ura3Δ0 his3Δ1 leu2Δ0 KAN-GPD-CDS1 KES1-GFP-HIS3</i>                                                                                                     |
| yPC8073 | <i>Mat ? ura3Δ0 his3Δ1 leu2Δ0 KAN-GPD-CDS1 KES1-GFP-HIS3 fld1::NAT</i>                                                                                           |
| yPC8071 | <i>Mat ? ura3Δ0 his3Δ1 leu2Δ0 KAN-GPD-CDS1 KES1-GFP-HIS3 ldb16::HYGB</i>                                                                                         |
| yPC4092 | <i>Mat a ura3Δ0 his3Δ1 leu2Δ0 met15Δ0 cho2::KAN</i>                                                                                                              |
| yPC5617 | <i>Mat ? ura3Δ0 his3Δ1 leu2Δ0 cho2::KAN ldb16::HYGB</i>                                                                                                          |
| yPC4067 | <i>Mat a ura3Δ0 his3Δ1 leu2Δ0 met15Δ0 opi3::KAN</i>                                                                                                              |
| yPC5752 | <i>Mat a ura3Δ0 his3Δ1 leu2Δ0 opi3::KAN ldb16::HYGB</i>                                                                                                          |
| yPC7452 | <i>Mat a ura3Δ0 his3Δ1 leu2Δ0 met15Δ0 GVP36-mCherry-URA3 HMG1-GFP-HIS3</i>                                                                                       |
| yPC7456 | <i>Mat ? ura3Δ0 his3Δ1 leu2Δ0 GVP36-mCherry-URA3 HMG1-GFP-HIS3 ldb16::HYGB</i>                                                                                   |
| yPC7454 | <i>Mat a ura3Δ0 his3Δ1 leu2Δ0 met15Δ0 VPS13-mCherry-URA3 HMG1-GFP-HIS3</i>                                                                                       |
| yPC7458 | <i>Mat ? ura3Δ0 his3Δ1 leu2Δ0 VPS13-mCherry-URA3 HMG1-GFP-HIS3 ldb16::HYGB</i>                                                                                   |
| yPC7064 | <i>Mat a ura3Δ0 his3Δ1 leu2Δ0 met15Δ0 Opi1-3HA-HIS3</i>                                                                                                          |
| yPC7065 | <i>Mat a ura3Δ0 his3Δ1 leu2Δ0 met15Δ0 Opi1-3HA-HIS3 fld1::HYGB</i>                                                                                               |
| yPC7066 | <i>Mat a ura3Δ0 his3Δ1 leu2Δ0 met15Δ0 Opi1-3HA-HIS3 ldb16::KAN</i>                                                                                               |
| yPC6258 | <i>Mat a leu2-3,122 ura3-52 his3D200 trp-D900 lys2-8-1 suc2D9 &lt;PHO5p-GFP-Scs2&gt;</i>                                                                         |
| yPC6262 | <i>Mat a leu2-3,122 ura3-52 his3D200 trp-D900 lys2-8-1 suc2D9 fld1::NAT &lt;PHO5p-GFP-Scs2&gt;</i>                                                               |
| yPC6338 | <i>Mat a leu2-3,122 ura3-52 his3D200 trp-D900 lys2-8-1 suc2D9 ldb16::HYGB &lt;PHO5p-GFP-Scs2&gt;</i>                                                             |
| yPC6446 | <i>Mat a ura3Δ0 his3Δ1 leu2Δ0 met15Δ0 &lt;FLAG-GFP-OPI1<sup>Q2</sup>, CEN, URA&gt;</i>                                                                           |
| yPC6447 | <i>Mat a ura3Δ0 his3Δ1 leu2Δ0 met15Δ0 ldb16::KAN&lt;FLAG-GFP-OPI1<sup>Q2</sup>, CEN, URA&gt;</i>                                                                 |
| yPC7792 | <i>Mat a ura3Δ0 his3Δ1 leu2Δ0 are1::KAN are2::HYGB dga1::NAT lro1::KAN &lt; Flag-GFP-KES1, CEN, URA&gt;</i>                                                      |
| yPC7795 | <i>Mat a ura3Δ0 his3Δ1 leu2Δ0 are1::KAN are2::HYGB dga1::NAT lro1::KAN ldb16::HIS &lt; Flag-GFP-KES1, CEN, URA&gt;</i>                                           |
| yPC8539 | <i>Mat a ura3Δ0 his3Δ1 leu2Δ0 are1::KAN are2::HYGB dga1::NAT lro1::KAN fld1::HIS? &lt; Flag-GFP-KES1, CEN, URA&gt;</i>                                           |
| yPC7828 | <i>Mat a ura3Δ0 his3Δ1 leu2Δ0 met15Δ0 KAN-GPD-CDS1 &lt;Flag-GFP-PCT1, CEN, URA&gt;</i>                                                                           |
| yPC7832 | <i>Mat a ura3Δ0 his3Δ1 leu2Δ0 met15Δ0 KAN-GPD-CDS1 ldb16::HYGB &lt;Flag-GFP-PCT1, CEN, URA&gt;</i>                                                               |
| yPC7834 | <i>Mat a ura3Δ0 his3Δ1 leu2Δ0 met15Δ0 KAN-GPD-CDS1 fld1::NAT &lt;Flag-GFP-PCT1, CEN, URA&gt;</i>                                                                 |
| yPC5144 | <i>Mat a ura3Δ0 his3Δ1 leu2Δ0 lys2Δ0 ELO3-mCherry-URA</i>                                                                                                        |
| yPC5199 | <i>Mat ? ura3Δ0 his3Δ1 leu2Δ0 ELO3-mCherry-URA fld1::NAT</i>                                                                                                     |
| yPC5201 | <i>Mat ? ura3Δ0 his3Δ1 leu2Δ0 ELO3-mCherry-URA ldb16::HYGB</i>                                                                                                   |
| yPC1573 | <i>Mat a ura3Δ0 his3Δ1 leu2Δ0 met15Δ0 SEC63-GFP-HIS5</i>                                                                                                         |
| yPC8122 | <i>Mat a ura3Δ0 his3Δ1 leu2Δ0 met15Δ0 SEC63-GFP-HIS5 fld1::NAT</i>                                                                                               |
| yPC8121 | <i>Mat a ura3Δ0 his3Δ1 leu2Δ0 met15Δ0 SEC63-GFP-HIS5 ldb16::NAT</i>                                                                                              |

Table S6. **Plasmids used in this study**

| Name    | Insert/gene                                           | Primers used  | Vector | Source                                     |
|---------|-------------------------------------------------------|---------------|--------|--------------------------------------------|
| pPC941  | PHO5p-GFP-Opi1 <sup>FFAT</sup> , URA3                 | NA            | pRS406 | Loewen et al., 2003                        |
| pPC933  | TEFp-GFP-Spo20 <sup>51-91</sup> , 2 $\mu$ , URA3      | NA            | pRS426 | Nakanishi et al., 2004                     |
| pPC1131 | Flag-GFP-KES1, CEN, URA3                              | 1688 and 1689 | pRS316 | This study                                 |
| pPC1224 | Flag-GFP-KES1 $\Delta$ <sup>2-29</sup> , CEN, URA3    | 1731          | pRS316 | This study                                 |
| bPC1130 | Flag-GFP-PCT1, CEN, URA3                              | 1690 and 1691 | pRS316 | This study                                 |
| pPC1226 | Flag-GFP-PCT1 $\Delta$ <sup>261-282</sup> , CEN, URA3 | 1733          | pRS316 | This study                                 |
| pPC1129 | Flag-GFP-GVP36, CEN, URA3                             | 1686 and 1687 | pRS316 | This study                                 |
| pPC1184 | GVP36-GFP, CEN, URA3                                  | NA            | pRS316 | This study                                 |
| pPC1183 | GVP36 $\Delta$ <sup>2-35</sup> -GFP, CEN, URA3        | 1818          | pRS416 | This study                                 |
| pPC924  | ADH1p-GAL4-ER-VP16, CEN, LEU                          | NA            | pRS415 | This study (based on Louvion et al., 1993) |
| pPC938  | PHO5p-GFP-Scs2                                        | NA            | pRS406 | Loewen et al., 2003                        |
| pPC974  | FLAG-GFP-OPI1 <sup>Q2</sup> , CEN, URA3               | 1339 and 1340 | pRS316 | This study                                 |

Table S7. **Primers used in this study**

| Number | Name                    | Sequence (5' to 3')                                 |
|--------|-------------------------|-----------------------------------------------------|
| 1688   | Kes1FXhol               | CATGGATGAACTATACAACTCGAGATGTCTCAATACGCAAGCTC        |
| 1689   | Kes1RBamHI              | CTATAGGGCGAATTGGCTAGTGGATCCGAGCGATCTGTCTATCAATAATTA |
| 1731   | Kes1 $\Delta$ (2–29)    | GATGAACTATACAACTCGAGATGCCTCCATTCATTTATCTCCAATC      |
| 1690   | Pct1FXhol               | GATGAACTATACAACTCGAGATGGCAAACCCAAACAGGGAAG          |
| 1691   | Pct1RBamHI              | GCGAATTGGCTAGTGGATCCTAATCAACTTTCTCTCCTTCAAATC       |
| 1733   | Pct1 $\Delta$ (261–282) | GACAGGAGCTGAACGTTTCTCACATCAATGAATTCAGGTC            |
| 1686   | Gvp36FXhol              | GAACTATACAACTCGAGATGTCGTTTAATGCCTTCGCCAG            |
| 1687   | Gvp36RBamHI             | GCGAATTGGCTAGTGGATCCGTATTGCGGTTGAGTAGCGTC           |
| 1818   | Gvp36 $\Delta$ (2–35)   | CAATCATAGTCATCAATGCAAAGAATGGTCCAGGAAC               |
| 185    | Yos9R5                  | CTATTGTACTCGAGGAGCAAGCTAAACAGATC                    |
| 1339   | Opi1Q2FXhol             | GAACTATACAACTCGAGGATGAGTTCTTACCACAAACAG             |
| 1340   | Opi1Q2RHindIII          | CACATACACGCTAAGCTTTTACTCGTCTCCGCCAGCTCCAG           |

## References

- Loewen, C.J., A. Roy, and T.P. Levine. 2003. A conserved ER targeting motif in three families of lipid binding proteins and in Opi1p binds VAP. *EMBO J.* 22:2025–2035. <http://dx.doi.org/10.1093/emboj/cdg201>
- Louvion, J.F., B. Havaux-Copf, and D. Picard. 1993. Fusion of GAL4-VP16 to a steroid-binding domain provides a tool for gratuitous induction of galactose-responsive genes in yeast. *Gene.* 131:129–134. [http://dx.doi.org/10.1016/0378-1119\(93\)90681-R](http://dx.doi.org/10.1016/0378-1119(93)90681-R)
- Nakanishi, H., P. de los Santos, and A.M. Neiman. 2004. Positive and negative regulation of a SNARE protein by control of intracellular localization. *Mol. Biol. Cell.* 15:1802–1815. <http://dx.doi.org/10.1091/mbc.E03-11-0798>
